# Supplementary material for: Application of group V polyoxometalate as an efficient base catalyst: a case study of decaniobate clusters
Source: Royal Society of Chemistry journal article supplement (doi:10.1039/c6ra00338a), 2016-01-01
Supplement: c6ra00338a1.pdf [file c6ra00338a1.pdf]

## Supporting Information

### Application of group V polyoxometalate as efficient base catalyst: a case study of decaniobate cluster

**Shun Hayashi<sup>†</sup>, Seiji Yamazoe<sup>\*,†,‡</sup>, Kiichirou Koyasu<sup>†,‡</sup>,  
and Tatsuya Tsukuda<sup>\*,†,‡</sup>**

<sup>†</sup>*Department of Chemistry, School of Science, The University of Tokyo, 7-3-1 Hongo,  
Bunkyo-Ku, Tokyo 113-0033, Japan*

<sup>‡</sup>*Elements Strategy Initiative for Catalysts and Batteries (ESICB), Kyoto University, Katsura,  
Kyoto 615-8520, Japan*

**Table S1.** Cartesian coordinates of the calculated  $[\text{Nb}_{10}\text{O}_{28}]^{6-}$  structure.

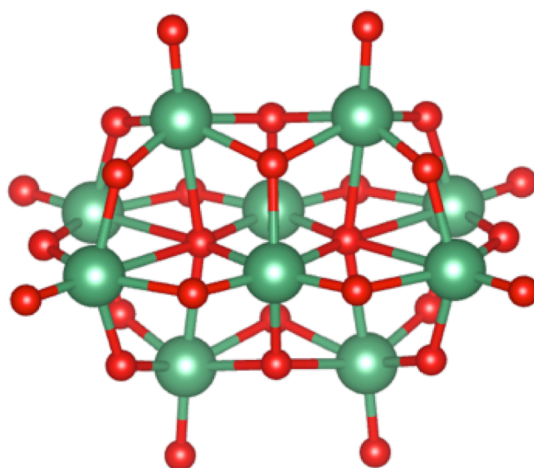

Green and red spheres represent Nb and O, respectively.

| Atom | X (Å)     | Y (Å)     | Z (Å)     |
|------|-----------|-----------|-----------|
| Nb   | 0.002517  | 0.001696  | -1.723302 |
| Nb   | -0.002419 | -0.001701 | 1.723192  |
| Nb   | 1.702047  | -2.478433 | 0.000966  |
| Nb   | -3.38787  | 0.001388  | -1.745362 |
| Nb   | 3.387111  | -0.000023 | -1.745166 |
| Nb   | -3.386708 | -0.001839 | 1.745193  |
| Nb   | -1.702172 | 2.478326  | 0.001572  |
| Nb   | 1.702036  | 2.477601  | 0.000646  |
| Nb   | -1.702202 | -2.47749  | -0.003307 |

|    |           |           |           |
|----|-----------|-----------|-----------|
| Nb | 3.387656  | 0.000487  | 1.745529  |
| O  | -1.380214 | -0.001201 | 0.003636  |
| O  | 1.37986   | 0.001245  | -0.003432 |
| O  | -0.002444 | 2.004534  | -1.267005 |
| O  | 0.000902  | 2.007537  | 1.261955  |
| O  | 0.003078  | -2.004472 | 1.266991  |
| O  | -0.001423 | -2.007595 | -1.26198  |
| O  | -2.912812 | 1.91782   | -1.419056 |
| O  | -2.91191  | 1.917799  | 1.420199  |
| O  | 2.909961  | 1.917393  | -1.422175 |
| O  | 2.914256  | 1.919925  | 1.418029  |
| O  | -2.915031 | -1.919443 | -1.418811 |
| O  | -2.909321 | -1.918145 | 1.421607  |
| O  | 2.911001  | -1.918135 | -1.419521 |
| O  | 2.913502  | -1.917263 | 1.419611  |
| O  | -4.322017 | -0.000608 | 0.000677  |
| O  | 4.321967  | 0.000589  | -0.000659 |
| O  | -1.545287 | -0.002932 | -2.790264 |
| O  | 1.54301   | -0.002382 | -2.797344 |
| O  | -1.542981 | 0.002392  | 2.797399  |
| O  | 1.545303  | 0.002884  | 2.790417  |
| O  | -1.833602 | 4.260166  | 0.000883  |
| O  | 1.831806  | 4.259626  | -0.001738 |
| O  | -1.831661 | -4.259531 | -0.001369 |
| O  | 1.83376   | -4.260256 | 0.001823  |
| O  | -4.67686  | 0.002202  | -3.003053 |
| O  | 4.676363  | -0.000453 | -3.0027   |
| O  | -4.675802 | -0.002571 | 3.002826  |
| O  | 4.676616  | 0.000822  | 3.003252  |

---

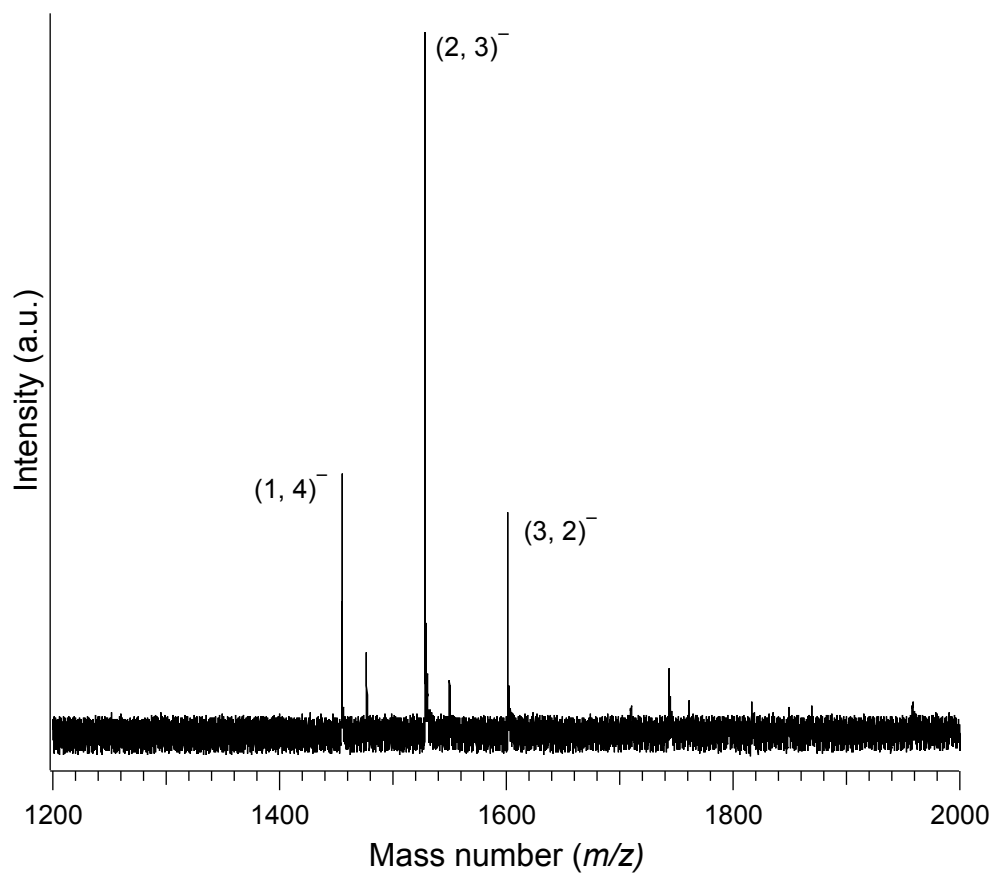

**Figure S1.** ESI-MS of  $(\text{TMA})_6[\text{Nb}_{10}\text{O}_{28}] \cdot 6\text{H}_2\text{O}$  after the reaction (entry 2-1 of Table 1). Peaks for  $(\text{TMA})_x\text{H}_y[\text{Nb}_{10}\text{O}_{28}]^-$  are noted as  $(x, y)^-$ .

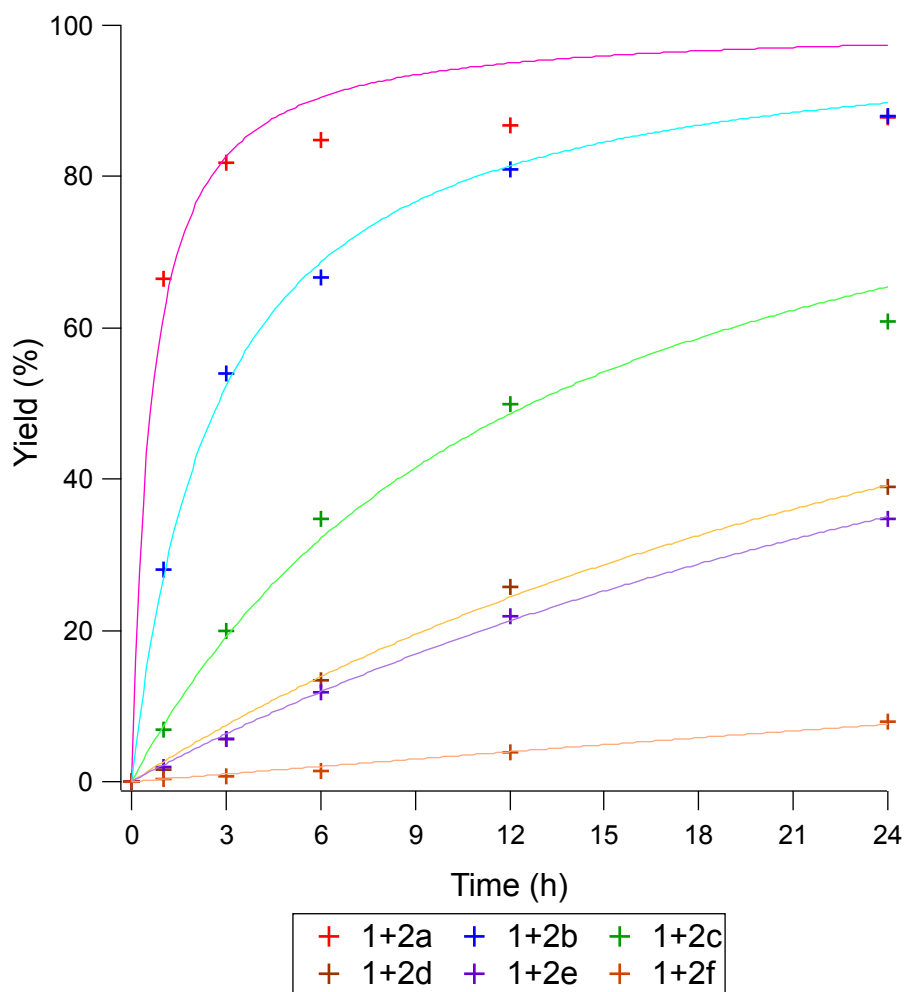

**Figure S2.** Time course of Knoevenagel condensation reactions at 343 K. Fitted curves were obtained by assuming that the coupling of nitriles with aldehyde was the rate-determining step and that the reactions followed irreversible second-order kinetics.
